# Supplementary material for: Rapid evaluation of COVID-19 vaccine effectiveness against symptomatic infection with SARS-CoV-2 variants by analysis of genetic distance
Source: PubMed Central journal article supplement (PMC9388371; doi:10.1038/s41591-022-01877-1), 2022-06-16
Supplement: 41591_2022_1877_MOESM1_ESM.pdf [file 41591_2022_1877_MOESM1_ESM.pdf]

---

**Supplementary information**

---

**Rapid evaluation of COVID-19 vaccine effectiveness against symptomatic infection with SARS-CoV-2 variants by analysis of genetic distance**

---

In the format provided by the authors and unedited

**Supplementary Information**

**Rapid evaluation of COVID-19 vaccine effectiveness against symptomatic infection with SARS-CoV-2 variants by analysis of genetic distance**

**Table 1: The source of COVID-19 vaccine efficacy or effectiveness (VE) data by December 24, 2021**

| No. | Developers                                                                            | Vaccine platforms              | Vaccine products                                                                                                                 | Countries                                | Epidemiological studies        | VE source           | Data derived from |
|-----|---------------------------------------------------------------------------------------|--------------------------------|----------------------------------------------------------------------------------------------------------------------------------|------------------------------------------|--------------------------------|---------------------|-------------------|
| 1   | Bharat Biotech                                                                        | Inactivated virus              | COVAXIN                                                                                                                          | India                                    | Phase 3 clinical trial         | <sup>1</sup>        | Table 2           |
| 2   | Sinopharm + China National Biotec Group Co + Beijing Institute of Biological Products | Inactivated virus              | Inactivated SARS-CoV-2 vaccine (Vero cell), vaccine name BBIBP-CorV                                                              | United Arab Emirates, Bahrain            | Phase 3 clinical trial         | <sup>2</sup>        | Table 2           |
| 3   | Sinopharm + China National Biotec Group Co + Wuhan Institute of Biological Products   | Inactivated virus              | Inactivated SARS-CoV-2 vaccine (Vero cell)                                                                                       | United Arab Emirates, Bahrain            | Phase 3 clinical trial         | <sup>2</sup>        | Table 2           |
| 4   | Sinovac Research and Development Co. Ltd                                              | Inactivated virus              | SARS-CoV-2 vaccine (Inactivated)                                                                                                 | Brazil                                   | Phase 3 clinical trial         | <sup>3</sup>        | Table 2           |
| 5   |                                                                                       |                                |                                                                                                                                  | Indonesia                                | Phase 3 clinical trial         | <sup>4</sup>        | Table 3           |
| 6   | BioNTech / Pfizer + Fosun Pharma                                                      | RNA based vaccine              | BNT162b2 (3 LNP-mRNAs)                                                                                                           | Argentina                                | Phase 3 clinical trial         | <sup>5</sup>        | Table 3           |
| 7   |                                                                                       |                                |                                                                                                                                  | Brazil                                   | Phase 3 clinical trial         | <sup>5</sup>        | Table 3           |
| 8   |                                                                                       |                                |                                                                                                                                  | United States of America                 | Phase 3 clinical trial         | <sup>5</sup>        | Table 3           |
| 9   |                                                                                       |                                |                                                                                                                                  | Argentina                                | Phase 3 clinical trial         | <sup>6</sup>        | Table 3           |
| 10  |                                                                                       |                                |                                                                                                                                  | Brazil                                   | Phase 3 clinical trial         | <sup>6</sup>        | Table 3           |
| 11  |                                                                                       |                                |                                                                                                                                  | United States of America                 | Phase 3 clinical trial         | <sup>6</sup>        | Table 3           |
| 12  | Moderna + National Institute of Allergy and Infectious Diseases (NIAID)               | RNA based vaccine              | mRNA-1273                                                                                                                        | United States of America                 | Phase 3 clinical trial         | <sup>7</sup>        | Figure 4          |
| 13  |                                                                                       |                                |                                                                                                                                  | United States of America                 | Phase 3 clinical trial         | <sup>8</sup>        | Figure 3          |
| 14  | Novavax                                                                               | Protein Subunit                | SARS-CoV-2 rS/Matrix M1-Adjuvant (Full length recombinant SARS-CoV-2 glycoprotein nanoparticle vaccine adjuvanted with Matrix M) | Mexico                                   | Phase 3 clinical trial         | <sup>9</sup>        | Figure 3          |
| 15  |                                                                                       |                                |                                                                                                                                  | United States of America                 | Phase 3 clinical trial         | <sup>9</sup>        | Figure 3          |
| 16  |                                                                                       |                                |                                                                                                                                  | South Africa (B.1.351)                   | Phase 3 clinical trial         | <sup>10</sup>       | Text              |
| 17  |                                                                                       |                                |                                                                                                                                  | United Kingdom (B.1.1.7)                 | Phase 3 clinical trial         | <sup>11</sup>       | Figure 4          |
| 18  |                                                                                       |                                |                                                                                                                                  | United Kingdom (Non-B.1.1.7)             | Phase 3 clinical trial         | <sup>11</sup>       | Figure 4          |
| 19  | CanSino Biological Inc./Beijing Institute of Biotechnology                            | Viral vector (Non-replicating) | Recombinant novel coronavirus vaccine (Adenovirus type 5 vector)                                                                 | Argentina                                | Phase 3 clinical trial         | <sup>12</sup>       | Table 2           |
| 20  | Gamaleya Research Institute; Health Ministry of the Russian Federation                | Viral vector (Non-replicating) | Gam-COVID-Vac Adeno-based (rAd26-S+rAd5-S)                                                                                       | Russia                                   | Phase 3 clinical trial         | <sup>13</sup>       | Table 2           |
| 21  | Janssen Pharmaceutical                                                                | Viral vector (Ad26)            | Ad26.COVS.2S                                                                                                                     | Argentina, Chile, Colombia, Mexico, Peru | Phase 3 clinical trial         | <sup>14</sup>       | Table 3           |
| 22  |                                                                                       |                                |                                                                                                                                  | Brazil                                   | Phase 3 clinical trial         | <sup>14</sup>       | Table 3           |
| 23  |                                                                                       |                                |                                                                                                                                  | South Africa (B.1.351)                   | Phase 3 clinical trial         | <sup>14</sup>       | Table 3           |
| 24  |                                                                                       |                                |                                                                                                                                  | United States of America                 | Phase 3 clinical trial         | <sup>14</sup>       | Table 3           |
| 25  |                                                                                       |                                |                                                                                                                                  |                                          | Viral vector (Non-replicating) | AZD1222 (ChAdOx1-S) | Brazil (B.1.1.28) |

|    |                                                                                                                                |                   |                                                                                                             |                                           |                            |         |          |
|----|--------------------------------------------------------------------------------------------------------------------------------|-------------------|-------------------------------------------------------------------------------------------------------------|-------------------------------------------|----------------------------|---------|----------|
| 26 | AstraZeneca + University of Oxford                                                                                             |                   |                                                                                                             | Brazil (P.1)                              | Phase 3 clinical trial     | 15      | Table 2  |
| 27 |                                                                                                                                |                   |                                                                                                             | Brazil (P.2)                              | Phase 3 clinical trial     | 15      | Table 2  |
| 28 |                                                                                                                                |                   |                                                                                                             | United States of America                  | Phase 3 clinical trial     | 16      | Figure 3 |
| 29 |                                                                                                                                |                   |                                                                                                             | Chile, Peru                               | Phase 3 clinical trial     | 16      | Figure 3 |
| 30 |                                                                                                                                |                   |                                                                                                             | Brazil                                    | Phase 3 clinical trial     | 17      | Table 2  |
| 31 |                                                                                                                                |                   |                                                                                                             | United Kingdom                            | Phase 3 clinical trial     | 17      | Table 2  |
| 32 |                                                                                                                                |                   |                                                                                                             | United Kingdom, Brazil, South Africa      | Phase 3 clinical trial     | 18      | Table 1  |
| 33 |                                                                                                                                |                   |                                                                                                             | United Kingdom (B.1.1.7)                  | Phase 3 clinical trial     | 19      | Table 1  |
| 34 |                                                                                                                                |                   |                                                                                                             | Bharat Biotech                            | Inactivated virus          | COVAXIN | India    |
| 35 | India (Vellore)                                                                                                                | Cohort            | 21                                                                                                          |                                           |                            |         | Text     |
| 36 | Sinopharm + China National Biotec Group Co + Beijing Institute of Biological Products Sinovac Research and Development Co. Ltd | Inactivated virus | Inactivated SARS-CoV-2 vaccine (Vero cell), vaccine name BBIBP-CorV<br><br>SARS-CoV-2 vaccine (Inactivated) | China (Guangzhou) (B.1.617.2)             | Cohort                     | 22      | Table 2  |
| 37 | Sinovac Research and Development Co. Ltd                                                                                       | Inactivated virus | SARS-CoV-2 vaccine (Inactivated)                                                                            | Brazil (Manaus)                           | Case-control               | 23      | Text     |
| 38 |                                                                                                                                |                   |                                                                                                             | Brazil (São Paulo State)                  | Case-control               | 24      | Table 2  |
| 39 | BioNTech / Pfizer + Fosun Pharma                                                                                               | RNA based vaccine | BNT162b2 (3 LNP-mRNAs)                                                                                      | Italy                                     | Cohort                     | 25      | Table 3  |
| 40 |                                                                                                                                |                   |                                                                                                             | Israel                                    | Cohort                     | 26      | Table 2  |
| 41 |                                                                                                                                |                   |                                                                                                             | US (Kentucky)                             | Cohort                     | 27      | Table 1  |
| 42 |                                                                                                                                |                   |                                                                                                             | Italy                                     | Cohort                     | 28      | Table 2  |
| 43 |                                                                                                                                |                   |                                                                                                             | Israel                                    | Cohort                     | 29      | Table 2b |
| 44 |                                                                                                                                |                   |                                                                                                             | Israel                                    | Cohort                     | 30      | Table    |
| 45 |                                                                                                                                |                   |                                                                                                             | United Kingdom (B.1.1.7)                  | Case-control               | 31      | Table 1  |
| 46 |                                                                                                                                |                   |                                                                                                             | United Kingdom (B.1.617.2)                | Case-control               | 31      | Table 1  |
| 47 |                                                                                                                                |                   |                                                                                                             | United Kingdom (B.1.1.7)                  | Case-control               | 32      | Table 2  |
| 48 |                                                                                                                                |                   |                                                                                                             | United Kingdom (B.1.617.2)                | Case-control               | 32      | Table 2  |
| 49 |                                                                                                                                |                   |                                                                                                             | United States of America (North Carolina) | Cohort                     | 33      | Text     |
| 50 |                                                                                                                                |                   |                                                                                                             | United States of America                  | Case-control               | 34      | Table 3  |
| 51 |                                                                                                                                |                   |                                                                                                             | Italy (Treviso)                           | Cohort                     | 35      | Table 2  |
| 52 |                                                                                                                                |                   |                                                                                                             | United Kingdom                            | Case-control               | 36      | Text     |
| 53 |                                                                                                                                |                   |                                                                                                             | Israel                                    | Cohort                     | 37      | Table 2  |
| 54 |                                                                                                                                |                   |                                                                                                             | United Kingdom (Scotland) (B.1.1.7)       | Test-negative case-control | 38      | Table S5 |

|    |                                                                         |                                |                                         |                                                                                     |                            |    |          |
|----|-------------------------------------------------------------------------|--------------------------------|-----------------------------------------|-------------------------------------------------------------------------------------|----------------------------|----|----------|
| 55 |                                                                         |                                |                                         | United Kingdom (Scotland) (B.1.617.2)                                               | Test-negative case-control | 38 | Table S5 |
| 56 |                                                                         |                                |                                         | Canada                                                                              | Case-control               | 39 | Table 2  |
| 57 |                                                                         |                                |                                         | Israel                                                                              | Cohort                     | 40 | Table 4  |
| 58 |                                                                         |                                |                                         | Israel                                                                              | Cohort                     | 41 | Text     |
| 59 | Moderna + National Institute of Allergy and Infectious Diseases (NIAID) | RNA based vaccine              | mRNA-1273                               | United States of America                                                            | Case-control               | 34 | Table 3  |
| 60 |                                                                         |                                |                                         | United States of America (North Carolina)                                           | Cohort                     | 33 | Text     |
| 61 |                                                                         |                                |                                         | United States of America (Southern California)                                      | Cohort                     | 42 | Table 3  |
| 62 | BioNTech / Pfizer + Fosun Pharma                                        | RNA based vaccine              | BNT162b2 (3 LNP-mRNAs)<br><br>mRNA-1273 | Canada (Ontario) (Earlier variant)                                                  | Test-negative case-control | 43 | eTable 6 |
| 63 | Moderna + National Institute of Allergy and Infectious Diseases (NIAID) |                                |                                         | Canada (Ontario) (B.1.1.7)                                                          | Test-negative case-control | 43 | eTable 6 |
| 64 |                                                                         |                                |                                         | Canada (Ontario) (B.1.351/P.1)                                                      | Test-negative case-control | 43 | eTable 6 |
| 65 |                                                                         |                                |                                         | France (Earlier variant)                                                            | Case-control               | 44 | Text     |
| 66 |                                                                         |                                |                                         | France (B.1.1.7)                                                                    | Case-control               | 44 | Text     |
| 67 |                                                                         |                                |                                         | France (B.1.351/P.1)                                                                | Case-control               | 44 | Text     |
| 68 |                                                                         |                                |                                         | United States of America (33 U.S. sites)                                            | Test-negative case-control | 45 | Table 2  |
| 69 |                                                                         |                                |                                         | United States of America (Michigan, Pennsylvania, Texas, Washington, and Wisconsin) | Test-negative case-control | 46 | Table 2  |
| 70 | Janssen Pharmaceutical                                                  | Viral vector (Ad26)            | Ad26.COV2.S                             | United States of America (North Carolina)                                           | Cohort                     | 33 | Text     |
| 71 |                                                                         |                                |                                         | Brazil (Mato-Grosso do Sul)                                                         | Test-negative case-control | 47 | Table 2  |
| 72 | AstraZeneca + University of Oxford                                      | Viral vector (Non-replicating) | AZD1222 (ChAdOx1-S)                     | United Kingdom (B.1.617.2)                                                          | Case-control               | 31 | Table 1  |
| 73 |                                                                         |                                |                                         | India                                                                               | Case-control               | 48 | Table 2  |
| 74 |                                                                         |                                |                                         | United Kingdom (B.1.1.7)                                                            | Case-control               | 32 | Table 2  |
| 75 |                                                                         |                                |                                         | United Kingdom (B.1.617.2)                                                          | Case-control               | 32 | Table 2  |
| 76 |                                                                         |                                |                                         | India (Puducherry)                                                                  | Test-negative case-control | 49 | Table 2  |
| 77 |                                                                         |                                |                                         | United Kingdom (Scotland) (B.1.1.7)                                                 | Test-negative case-control | 38 | Table S5 |
| 78 |                                                                         |                                |                                         | United Kingdom (Scotland) (B.1.617.2)                                               | Test-negative case-control | 38 | Table S5 |

**Table 2: COVID-19 VE prediction models for different vaccine platforms based on the genetic distance on the RBD**

| <b>Vaccine platforms</b>       |       | <b>Slope (95% CI)</b>                            |       |
|--------------------------------|-------|--------------------------------------------------|-------|
| mRNA                           |       | -5.2 (-8.0, -2.4)                                |       |
| Viral-vector                   |       | -6.8 (-9.4, -4.2)                                |       |
| Protein subunit                |       | -14.3 (-19.2, -9.4)                              |       |
| Inactivated                    |       | -15.8 (-19.3, -12.4)                             |       |
|                                |       |                                                  |       |
| <b>Random effects variance</b> | 146.0 | <b>Two-sided <i>p</i>-value for RBD mismatch</b> | 0.038 |
| <b>Error variance</b>          | 38.8  | <b><i>R</i><sup>2</sup></b>                      | 86.3% |

**Table 3: COVID-19 VE prediction models for six vaccine products based on the genetic distance on the RBD**

| <b>Vaccine products</b>        |       | <b>Slope (95% CI)</b>                            |       |
|--------------------------------|-------|--------------------------------------------------|-------|
| Moderna: mRNA-1273             |       | -4.8 (-7.8, -1.9)                                |       |
| Pfizer–BioNTech: BNT162b2      |       | -7.5 (-10.9, -4.1)                               |       |
| Oxford–AstraZeneca: AZD1222    |       | -5.0 (-7.8, -2.2)                                |       |
| Janssen: Ad26.COVS.2           |       | -8.5 (-12.1, -4.9)                               |       |
| Sinovac: CoronaVac             |       | -13.6 (-17.1, -10.1)                             |       |
| Novavax: NVX-CoV2373           |       | -14.1 (-18.2, -10.0)                             |       |
| <b>Random effects variance</b> |       |                                                  |       |
|                                | 145.0 | <b>Two-sided <i>p</i>-value for RBD mismatch</b> | 0.006 |
| <b>Error variance</b>          |       |                                                  |       |
|                                | 26.9  | <b><i>R</i><sup>2</sup></b>                      | 87.9% |

**Table 4: COVID-19 VE prediction models for different vaccine platforms based on the genetic distance on the NTD and S protein**

| <b>By genetic distance on the NTD:</b> |       |                                                  |       |
|----------------------------------------|-------|--------------------------------------------------|-------|
| <b>Vaccine platforms</b>               |       | <b>Slope (95% CI)</b>                            |       |
| mRNA                                   |       | -2.5 (-4.6, -0.5)                                |       |
| Viral-vector                           |       | -4.0 (-6.1, -1.8)                                |       |
| Protein subunit                        |       | -5.6 (-9.5, -1.7)                                |       |
| Inactivated                            |       | -7.8 (-10.2, -5.5)                               |       |
|                                        |       |                                                  |       |
| <b>Random effects variance</b>         | 105.9 | <b>Two-sided <i>p</i>-value for NTD mismatch</b> | 0.086 |
| <b>Error variance</b>                  | 62.4  | <b><i>R</i><sup>2</sup></b>                      | 75.8% |

| <b>By genetic distance on the S protein:</b> |      |                                                        |       |
|----------------------------------------------|------|--------------------------------------------------------|-------|
| <b>Vaccine platforms</b>                     |      | <b>Slope (95% CI)</b>                                  |       |
| mRNA                                         |      | -0.8 (-1.7, 0.2)                                       |       |
| Viral-vector                                 |      | -1.6 (-2.6, -0.6)                                      |       |
| Protein subunit                              |      | -2.2 (-4.0, -0.5)                                      |       |
| Inactivated                                  |      | -4.1 (-5.2, -2.9)                                      |       |
|                                              |      |                                                        |       |
| <b>Random effects variance</b>               | 79.6 | <b>Two-sided <i>p</i>-value for S protein mismatch</b> | 0.082 |
| <b>Error variance</b>                        | 64.3 | <b><i>R</i><sup>2</sup></b>                            | 78.4% |



**Table 5: The source of COVID-19 vaccine efficacy or effectiveness (VE) for validation**

| No.                 | Vaccine products | Vaccine Platforms | Observed VE | (95%CI)      | References    |
|---------------------|------------------|-------------------|-------------|--------------|---------------|
| Alpha (B.1.1.7)     |                  |                   |             |              |               |
| [1]                 | BNT162b2         | mRNA              | 97          | (96, 98)     | <sup>31</sup> |
| [2]                 | BNT162b2         | mRNA              | 93.7        | (91.6, 95.3) | <sup>32</sup> |
| [3]                 | BNT162b2         | mRNA              | 92          | (88, 94)     | <sup>38</sup> |
| [4]                 | BNT162b2         | mRNA              | 90          | (85, 94)     | <sup>43</sup> |
| [5]                 | BNT162b2         | mRNA              | 86          | (81, 90)     | <sup>44</sup> |
| [6]                 | AZD1222          | Viral vector      | 81          | (72, 87)     | <sup>38</sup> |
| [7]                 | AZD1222          | Viral vector      | 74.5        | (68.4, 79.4) | <sup>32</sup> |
| [8]                 | AZD1222          | Viral vector      | 70.4        | (43.6, 84.5) | <sup>19</sup> |
| Beta (B.1.351)      |                  |                   |             |              |               |
| [9]                 | BNT162b2         | mRNA              | 77          | (63, 86)     | <sup>44</sup> |
| [10]                | Ad26.COV2.S      | Viral vector      | 52          | (30.3, 67.4) | <sup>14</sup> |
| Gamma (P.1)         |                  |                   |             |              |               |
| [11]                | BNT162b2         | mRNA              | 88          | (61, 96)     | <sup>43</sup> |
| [12]                | AZD1222          | Viral vector      | 63.6        | (-2.1, 87)   | <sup>15</sup> |
| Delta (B.1.617.2)   |                  |                   |             |              |               |
| [13]                | BNT162b2         | mRNA              | 88          | (85.3, 90.1) | <sup>32</sup> |
| [14]                | BNT162b2         | mRNA              | 84          | (82, 86)     | <sup>31</sup> |
| [15]                | BNT162b2         | mRNA              | 83          | (78, 87)     | <sup>38</sup> |
| [16]                | AZD1222          | Viral vector      | 71          | (66, 74)     | <sup>31</sup> |
| [17]                | AZD1222          | Viral vector      | 67          | (61.3, 71.8) | <sup>32</sup> |
| [18]                | AZD1222          | Viral vector      | 61          | (51, 70)     | <sup>38</sup> |
| [19]                | Covaxin          | Inactivated       | 65.2        | (33.1, 83)   | <sup>1</sup>  |
| [20]                | CoronaVac        | Inactivated       | 60.4        | (31.8, 88.9) | <sup>22</sup> |
| B.1.1.28            |                  |                   |             |              |               |
| [21]                | AZD1222          | Viral vector      | 72.6        | (46.4, 86)   | <sup>15</sup> |
| Zeta (P.2)          |                  |                   |             |              |               |
| [22]                | AZD1222          | Viral vector      | 68.7        | (54.9, 78.3) | <sup>15</sup> |
| Omicron (B.1.1.529) |                  |                   |             |              |               |
| [23]                | mRNA-1273        | mRNA              | 13.9        | (10.5, 17.1) | <sup>50</sup> |

**Table 6: SARS-CoV-2 variants tracked by WHO, including variants of concern (VOCs), variants of interest (VOIs), variants under monitoring (VUMs) and formerly monitored variants (March 16, 2022)**

| Pango lineages  | WHO label | Nextstrain clade | GISAIID clade | VOI or VOC                  | Earliest documented samples          | Mutations in S protein                                                                                                                                                                                                                                                                                                                                                              |
|-----------------|-----------|------------------|---------------|-----------------------------|--------------------------------------|-------------------------------------------------------------------------------------------------------------------------------------------------------------------------------------------------------------------------------------------------------------------------------------------------------------------------------------------------------------------------------------|
| B.1.1.7         | Alpha     | 20I (V1)         | GRY           | VOC                         | United Kingdom                       | 69-70del, 144del, N501Y, A570D, D614G, P681H, T716I, S982A, D1118H                                                                                                                                                                                                                                                                                                                  |
| B.1.351         | Beta      | 20H (V2)         | GH/501Y.V2    | VOC                         | South Africa                         | D80A, D215G, Δ242-244, K417N, E484K, N501Y, D614G, A701V                                                                                                                                                                                                                                                                                                                            |
| P.1             | Gamma     | 20J (V3)         | GR/501Y.V3    | VOC                         | Brazil                               | L18F, T20N, P26S, D138Y, R190S, K417T, E484K, N501Y, D614G, H655Y, T1027I, V1176F                                                                                                                                                                                                                                                                                                   |
| B.1.617.2       | Delta     | 21A, 21I, 21J    | G/478K.V1     | VOC                         | India                                | T19R, 157del, L452R, T478K, D614G, P681R, D950N                                                                                                                                                                                                                                                                                                                                     |
| B.1.1.529       | Omicron   | 21K, 21L, 21M    | GRA           | VOC                         | Multiple countries                   | T19I, L24del, P25del, P26del, A27S, A67V, H69del, V70del, T95I, G142D, V143del, Y144del, Y145del, N211I, L212V, V213R, V213G, ins214EP, R214del, R216E, G339D, R346K, S371F, S371L, S373P, S375F, T376A, D405N, R408S, K417N, N440K, G446S, S477N, T478K, E484A, Q493R, G496S, Q498R, N501Y, Y505H, T547K, D614G, H655Y, N679K, P681H, N764K, D796Y, Q954H, N969K, N856K and L981F, |
| C.37            | Lambda    | 21G              | GR/452Q.V1    | VOI                         | Peru                                 | G75V, T76I, 249del, 251del, 252del, L452Q, F490S, D614G, T859N                                                                                                                                                                                                                                                                                                                      |
| B.1.621         | Mu        | 21H              | GH            | VOI                         | Colombia                             | T95I, Y144S, Y145N, R346K, E484K, N501Y, D614G, P681H, D950N                                                                                                                                                                                                                                                                                                                        |
| B.1.1.318       | -         | -                | GR            | VUM                         | Multiple countries                   | T95I, E484K, D614G, P681H, D796H                                                                                                                                                                                                                                                                                                                                                    |
| C.1.2           | -         | -                | GR            | VUM                         | South Africa                         | P9L, P25L, C136F, R190S, D215G, Y449H, T478K, E484K, N501Y, D614G, H655Y, N679K, T716I                                                                                                                                                                                                                                                                                              |
| B.1.640         | -         | -                | GH/490R       | VUM                         | Multiple countries                   | P9L, E96Q, R190S, I210T, D215H, R346S, N394S, Y449N, E484K, F490R, N501Y, D614G, P681H, T859N, D936H, D1139H                                                                                                                                                                                                                                                                        |
| AV.1            | -         | -                | GR            | Formerly monitored variants | United Kingdom                       | D80G, T95I, G142D, N439K, E484K, D614G, P681H, I1130V, D1139H                                                                                                                                                                                                                                                                                                                       |
| AT.1            | -         | -                | GR            | Formerly monitored variants | Russian Federation                   | P9L, H245P, E484K, D614G, E780K                                                                                                                                                                                                                                                                                                                                                     |
| P.2             | Zeta      | 20B/S.484K       | GR/484K.V2    | Formerly monitored variants | Brazil                               | E484K, D614G, V1176F                                                                                                                                                                                                                                                                                                                                                                |
| P.3             | Theta     | 21E              | GR/1092K.V1   | Formerly monitored variants | Philippines                          | 141-143del, E484K, N501Y, D614G, P681H, E1092K, H1101Y, V1176F                                                                                                                                                                                                                                                                                                                      |
| R.1             | -         | 20B              | GR            | Formerly monitored variants | Multiple countries                   | W152L, E484K, D614G, G769V                                                                                                                                                                                                                                                                                                                                                          |
| B.1.466.2       | -         | -                | GH            | Formerly monitored variants | Indonesia                            | N439K, D614G, P681R                                                                                                                                                                                                                                                                                                                                                                 |
| B.1.1.519       | -         | 20B/S.732A       | GR            | Formerly monitored variants | Multiple countries                   | T478K, D614G, P681H, T732A                                                                                                                                                                                                                                                                                                                                                          |
| C.36.3          | -         | -                | GR            | Formerly monitored variants | Multiple countries                   | S12F, W152R, R346S, L452R, D614G, Q677H, A899S                                                                                                                                                                                                                                                                                                                                      |
| B.1.214.2       | -         | -                | G             | Formerly monitored variants | Multiple countries                   | Q414K, N450K, D614G, T716I                                                                                                                                                                                                                                                                                                                                                          |
| B.1.427/B.1.429 | Epsilon   | 21C              | GH/452R.V1    | Formerly monitored variants | California, United States of America | S13I, W152C, L452R, D614G                                                                                                                                                                                                                                                                                                                                                           |

|           |       |            |            |                             |                                    |                                                                               |
|-----------|-------|------------|------------|-----------------------------|------------------------------------|-------------------------------------------------------------------------------|
| B.1.1.523 | -     | -          | GR         | Formerly monitored variants | Multiple countries                 | F306L, E484K, S494P, D614G, E780A, D839V, T1027I                              |
| B.1.619   | -     | 20A/S.126A | G          | Formerly monitored variants |                                    | I210T, N440K, E484K, D614G, D936N, S939F, T1027I                              |
| B.1.620   | -     | -          | G          | Formerly monitored variants | Multiple countries                 | P26S, V126A, H245Y, S477N, E484K, D614G, P681H, T1027I, D1118H                |
| B.1.526   | Iota  | 21F        | GH/253G.V1 | Formerly monitored variants | New York, United States of America | L5F, T95I, D253G, D614G, A701V                                                |
| B.1.525   | Eta   | 21D        | G/484K.V3  | Formerly monitored variants | Multiple countries                 | Q52R, A67V, 69del, 70del, 144del, E484K, D614G, Q677H, F888L                  |
| B.1.617.1 | Kappa | 21B        | G/452R.V3  | Formerly monitored variants | India                              | T95I, G142D, E154K, L452R, E484Q, D614G, P681R, Q1071H                        |
| B.1.630   | -     | -          | GH         | Formerly monitored variants | Dominican Republic                 | P9L, C136F, A222V, A243del, L244del, L452R, T478R, E484Q, H655Y, D614G, D950N |

**Table 7: Randomly selected strains from the variants tracked by WHO to investigate the best candidate vaccine antigens**

| Pango lineages | Accession number | Strain names                                     | Source |
|----------------|------------------|--------------------------------------------------|--------|
| B.1.1.7        | EPI_ISL_1718637  | hCoV-19/England/ALDP-15182AD/2021                | GISAID |
| B.1.351        | EPI_ISL_1534311  | hCoV-19/South Africa/NHLS-UCT-GS-B188/2021       | GISAID |
| P.1            | EPI_ISL_1495024  | hCoV-19/Brazil/MG-LBI246/2021                    | GISAID |
| B.1.617.2      | EPI_ISL_1704630  | hCoV-19/India/MH-ICMR-NIV-INSACOG-GSEQ-1304/2021 | GISAID |
| BA.1           | EPI_ISL_9215151  | hCoV-19/USA/CA-Curative-120628/2021              | GISAID |
| BA.1.1         | EPI_ISL_7877115  | hCoV-19/India/un-LNHD6/2021                      | GISAID |
| BA.2           | EPI_ISL_7971635  | hCoV-19/South Africa/NICD-N23195/2021            | GISAID |
| BA.3           | EPI_ISL_7747499  | hCoV-19/South Africa/CERI-KRISP-K033318/2021     | GISAID |
| C.37           | EPI_ISL_1629764  | hCoV-19/Peru/LIM-UPCH-0372/2021                  | GISAID |
| B.1.621        | EPI_ISL_2828025  | hCoV-19/Colombia/BOL-INS-VG-2019/2021            | GISAID |
| B.1.1.318      | EPI_ISL_7335871  | hCoV-19/USA/CA-CDPH-3000035642/2021              | GISAID |
| C.1.2          | EPI_ISL_7456442  | hCoV-19/South Africa/NICD-N21411/2021            | GISAID |
| B.1.640.1      | EPI_ISL_7267558  | hCoV-19/France/CVL-CERBAHC-11681217/2021         | GISAID |
| B.1.640.2      | EPI_ISL_7412265  | hCoV-19/USA/TX-CDC-ASC210487089/2021             | GISAID |
| AT.1           | EPI_ISL_3454818  | hCoV-19/Russia/OMS-RII-MH22451S/2021             | GISAID |
| AV.1           | EPI_ISL_3291235  | hCoV-19/England/PHEC-Q303Q1F8/2021               | GISAID |
| P.2            | EPI_ISL_1240642  | hCoV-19/Brazil/MG-FUNED-49391-21/2021            | GISAID |
| P.3            | EPI_ISL_1122458  | hCoV-19/Philippines/PH-PGC-02772/2021            | GISAID |
| R.1            | EPI_ISL_1793651  | hCoV-19/Japan/YCH0165/2021                       | GISAID |
| B.1.466.2      | EPI_ISL_7472531  | hCoV-19/Indonesia/JB-GS-WJHL-ITB-GS-184/2021     | GISAID |
| B.1.1.519      | EPI_ISL_7703862  | hCoV-19/USA/CA-CDPH-3000109212/2021              | GISAID |
| C.36.3         | EPI_ISL_8215718  | hCoV-19/Egypt/NRC-627/2021                       | GISAID |
| B.1.214.2      | EPI_ISL_4370585  | hCoV-19/USA/CO-CDC-FG-014845/2021                | GISAID |
| B.1.429        | EPI_ISL_1525760  | hCoV-19/USA/CA-CDC-FG-015454/2021                | GISAID |
| B.1.1.523      | EPI_ISL_8189540  | hCoV-19/Russia/MAG-CRIE-L188T0024u/2021          | GISAID |
| B.1.619        | EPI_ISL_7667718  | hCoV-19/Canada/QC-1nQUP-9969036211/2021          | GISAID |
| B.1.620        | EPI_ISL_7120450  | hCoV-19/Congo/RC-116/2021                        | GISAID |
| B.1.525        | EPI_ISL_1729603  | hCoV-19/Germany/BY-RKI-I-095380/2021             | GISAID |
| B.1.526        | EPI_ISL_1200537  | hCoV-19/USA/NY-NYCPHL-003648/2021                | GISAID |
| B.1.617.1      | EPI_ISL_1818634  | hCoV-19/India/KA-NIMH-SEQ-374/2021               | GISAID |
| B.1.630        | EPI_ISL_2828025  | hCoV-19/Colombia/BOL-INS-VG-2019/2021            | GISAID |
| B.1            | EPI_ISL_1473493  | hCoV-19/England/CAMC-145D216/2021                | GISAID |
| B.1.2          | EPI_ISL_1553218  | hCoV-19/USA/IL-S21WGS344/2021                    | GISAID |
| B.1.617.3      | EPI_ISL_1704623  | hCoV-19/India/MH-ICMR-NIV-INSACOG-GSEQ-1294/2021 | GISAID |

**Fig. 1: Schematic representation of the SARS-CoV-2 genome**

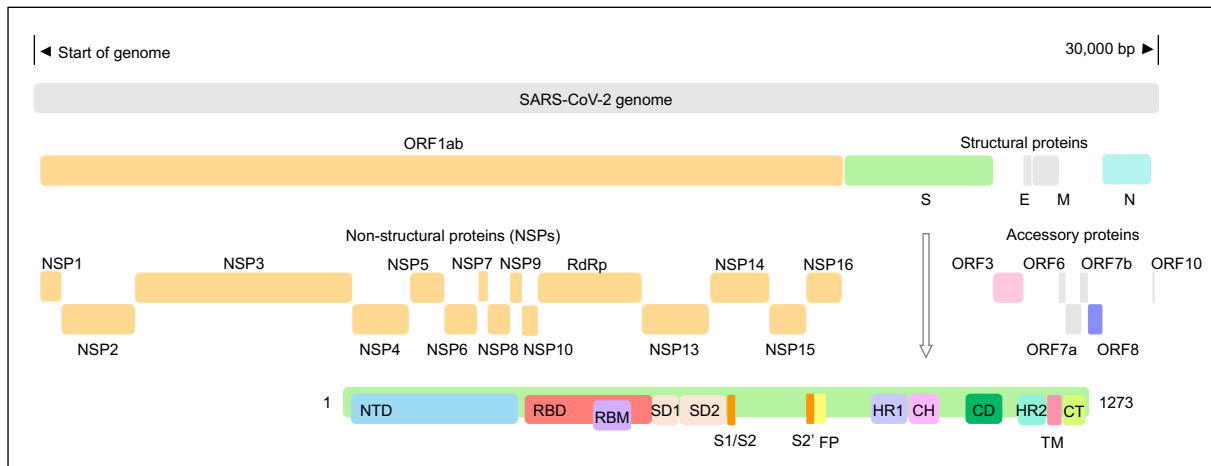

**Fig. 2: Structure of the SARS-CoV-2 Spike protein**

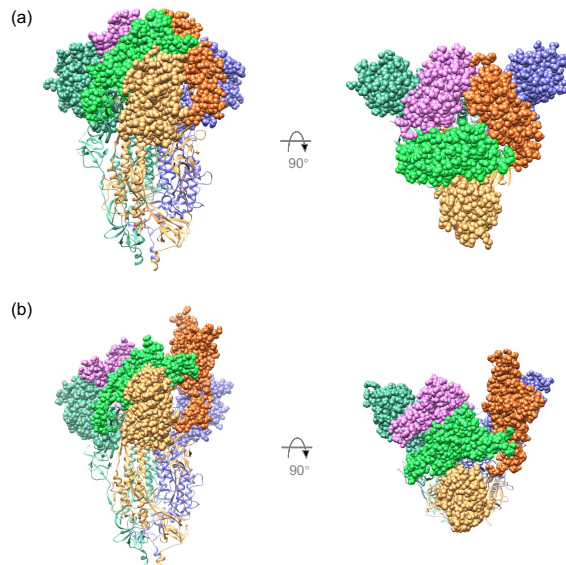

Legend: The location of receptor-binding domain (RBD) and N-terminal domain (NTD) are displayed on the 3D structure of SARS-CoV-2 Spike protein. Panel (a): the conformation of the prefusion trimer; all RBDs in the closed position. Panel (b): the active conformation; one RBD in the open position. The structures are shown from the side view and the top view, respectively. The RBD codons are highlighted in orchid, green and orange spheres. The NTD codons are marked in purple, dark green and yellow. Chimera<sup>51</sup> was used to generate the stereo view of S protein structure with 6VXX<sup>52</sup> and 7DWZ<sup>53</sup> of Protein Data Bank.

## References

1. Ella, R., *et al.* Efficacy, safety, and lot-to-lot immunogenicity of an inactivated SARS-CoV-2 vaccine (BBV152): interim results of a randomised, double-blind, controlled, phase 3 trial. *Lancet* **398**, 2173-2184 (2021).
2. Al Kaabi, N., *et al.* Effect of 2 Inactivated SARS-CoV-2 Vaccines on Symptomatic COVID-19 Infection in Adults: A Randomized Clinical Trial. *Jama* **326**, 35-45 (2021).
3. Palacios, R., *et al.* Efficacy and safety of a COVID-19 inactivated vaccine in healthcare professionals in Brazil: the PROFISCOV study. (2021).
4. Fadlyana, E., *et al.* A phase III, observer-blind, randomized, placebo-controlled study of the efficacy, safety, and immunogenicity of SARS-CoV-2 inactivated vaccine in healthy adults aged 18-59 years: An interim analysis in Indonesia. *Vaccine* **39**, 6520-6528 (2021).
5. Polack, F.P., *et al.* Safety and Efficacy of the BNT162b2 mRNA Covid-19 Vaccine. *N Engl J Med* **383**, 2603-2615 (2020).
6. Thomas, S.J., *et al.* Safety and Efficacy of the BNT162b2 mRNA Covid-19 Vaccine through 6 Months. *N Engl J Med* **385**, 1761-1773 (2021).
7. Baden, L.R., *et al.* Efficacy and Safety of the mRNA-1273 SARS-CoV-2 Vaccine. *N Engl J Med* **384**, 403-416 (2021).
8. El Sahly, H.M., *et al.* Efficacy of the mRNA-1273 SARS-CoV-2 Vaccine at Completion of Blinded Phase. *N Engl J Med* **385**, 1774-1785 (2021).
9. Dunkle, L.M., *et al.* Efficacy and Safety of NVX-CoV2373 in Adults in the United States and Mexico. *N Engl J Med* **386**, 531-543 (2022).
10. Shinde, V., *et al.* Efficacy of NVX-CoV2373 Covid-19 Vaccine against the B.1.351 Variant. *N Engl J Med* **384**, 1899-1909 (2021).
11. Heath, P.T., *et al.* Efficacy of the NVX-CoV2373 Covid-19 Vaccine Against the B.1.1.7 Variant. *medRxiv*, 2021.05.13.21256639 (2021).
12. Halperin, S.A., *et al.* Final efficacy analysis, interim safety analysis, and immunogenicity of a single dose of recombinant novel coronavirus vaccine (adenovirus type 5 vector) in adults 18 years and older: an international, multicentre, randomised, double-blinded, placebo-controlled phase 3 trial. *Lancet* **399**, 237-248 (2022).
13. Logunov, D.Y., *et al.* Safety and efficacy of an rAd26 and rAd5 vector-based heterologous prime-boost COVID-19 vaccine: an interim analysis of a randomised controlled phase 3 trial in Russia. *Lancet* **397**, 671-681 (2021).
14. Sadoff, J., *et al.* Safety and Efficacy of Single-Dose Ad26.COV2.S Vaccine against Covid-19. *N Engl J Med* **384**, 2187-2201 (2021).
15. Clemens, S.A.C., *et al.* Efficacy of ChAdOx1 nCoV-19 (AZD1222) vaccine against SARS-CoV-2 lineages circulating in Brazil. *Nat Commun* **12**, 5861 (2021).
16. Falsey, A.R., *et al.* Phase 3 Safety and Efficacy of AZD1222 (ChAdOx1 nCoV-19) Covid-19 Vaccine. *N Engl J Med* **385**, 2348-2360 (2021).
17. Voysey, M., *et al.* Safety and efficacy of the ChAdOx1 nCoV-19 vaccine (AZD1222) against SARS-CoV-2: an interim analysis of four randomised controlled trials in Brazil, South Africa, and the UK. *Lancet* **397**, 99-111 (2021).
18. Voysey, M., *et al.* Single-dose administration and the influence of the timing of the booster dose on immunogenicity and efficacy of ChAdOx1 nCoV-19 (AZD1222) vaccine: a pooled analysis of four randomised trials. *Lancet* **397**, 881-891 (2021).

19. Emary, K.R.W., *et al.* Efficacy of ChAdOx1 nCoV-19 (AZD1222) vaccine against SARS-CoV-2 variant of concern 202012/01 (B.1.1.7): an exploratory analysis of a randomised controlled trial. *Lancet* **397**, 1351-1362 (2021).
20. Desai, D., *et al.* Effectiveness of an inactivated virus-based SARS-CoV-2 vaccine, BBV152, in India: a test-negative, case-control study. *Lancet Infect Dis* **22**, 349-356 (2022).
21. Murugesan, M., *et al.* Protective effect conferred by prior infection and vaccination on COVID-19 in a Healthcare Worker Cohort in South India. *Available at SSRN 3914633* (2021).
22. Kang, M., *et al.* Effectiveness of Inactivated COVID-19 Vaccines Against Illness Caused by the B.1.617.2 (Delta) Variant During an Outbreak in Guangdong, China : A Cohort Study. *Ann Intern Med* (2022).
23. Hitchings, M.D.T., *et al.* Effectiveness of CoronaVac among healthcare workers in the setting of high SARS-CoV-2 Gamma variant transmission in Manaus, Brazil: A test-negative case-control study. *Lancet Reg Health Am* **1**, 100025 (2021).
24. Ranzani, O.T., *et al.* Effectiveness of the CoronaVac vaccine in older adults during a gamma variant associated epidemic of covid-19 in Brazil: test negative case-control study. *Bmj* **374**, n2015 (2021).
25. Bianchi, F.P., *et al.* BNT162b2 mRNA COVID-19 Vaccine Effectiveness in the Prevention of SARS-CoV-2 Infection and Symptomatic Disease in Five-Month Follow-Up: A Retrospective Cohort Study. *Vaccines (Basel)* **9**(2021).
26. Dagan, N., *et al.* BNT162b2 mRNA Covid-19 Vaccine in a Nationwide Mass Vaccination Setting. *N Engl J Med* **384**, 1412-1423 (2021).
27. Cavanaugh, A.M., *et al.* COVID-19 Outbreak Associated with a SARS-CoV-2 R.1 Lineage Variant in a Skilled Nursing Facility After Vaccination Program - Kentucky, March 2021. *MMWR Morb Mortal Wkly Rep* **70**, 639-643 (2021).
28. Giansante, C., *et al.* COVID-19 vaccine effectiveness among the staff of the Bologna Health Trust, Italy, December 2020-April 2021. *Acta Biomed* **92**, e2021270 (2021).
29. Regev-Yochay, G., *et al.* Decreased infectivity following BNT162b2 vaccination: A prospective cohort study in Israel. *Lancet Reg Health Eur* **7**, 100150 (2021).
30. Katz, M.A., *et al.* Early effectiveness of BNT162b2 Covid-19 vaccine in preventing SARS-CoV-2 infection in healthcare personnel in six Israeli hospitals (CoVEHPI). *Vaccine* **40**, 512-520 (2022).
31. Pouwels, K.B., *et al.* Effect of Delta variant on viral burden and vaccine effectiveness against new SARS-CoV-2 infections in the UK. *Nat Med* **27**, 2127-2135 (2021).
32. Lopez Bernal, J., *et al.* Effectiveness of Covid-19 Vaccines against the B.1.617.2 (Delta) Variant. *N Engl J Med* **385**, 585-594 (2021).
33. Lin, D., *et al.* Effectiveness of Covid-19 vaccines in the United States over 9 months: surveillance data from the state of North Carolina. *medRxiv* (2021).
34. Pilishvili, T., *et al.* Effectiveness of mRNA Covid-19 Vaccine among U.S. Health Care Personnel. *N Engl J Med* **385**, e90 (2021).
35. Fabiani, M., *et al.* Effectiveness of the Comirnaty (BNT162b2, BioNTech/Pfizer) vaccine in preventing SARS-CoV-2 infection among healthcare workers, Treviso province, Veneto region, Italy, 27 December 2020 to 24 March 2021. *Euro Surveill* **26**(2021).
36. Lopez Bernal, J., *et al.* Effectiveness of the Pfizer-BioNTech and Oxford-AstraZeneca vaccines on covid-19 related symptoms, hospital admissions, and mortality in older adults in England: test negative case-control study. *Bmj* **373**, n1088 (2021).
37. Haas, E.J., *et al.* Impact and effectiveness of mRNA BNT162b2 vaccine against SARS-CoV-2 infections and COVID-19 cases, hospitalisations, and deaths following a nationwide



- vaccination campaign in Israel: an observational study using national surveillance data. *Lancet* **397**, 1819-1829 (2021).
38. Sheikh, A., McMenamin, J., Taylor, B. & Robertson, C. SARS-CoV-2 Delta VOC in Scotland: demographics, risk of hospital admission, and vaccine effectiveness. *Lancet* **397**, 2461-2462 (2021).
  39. Carazo, S., *et al.* Single-dose mRNA vaccine effectiveness against SARS-CoV-2 in healthcare workers extending 16 weeks post-vaccination: a test-negative design from Quebec, Canada. *Clin Infect Dis* (2021).
  40. Glatman-Freedman, A., Bromberg, M., Dichtiar, R., Hershkovitz, Y. & Keinan-Boker, L. The BNT162b2 vaccine effectiveness against new COVID-19 cases and complications of breakthrough cases: A nation-wide retrospective longitudinal multiple cohort analysis using individualised data. *EBioMedicine* **72**, 103574 (2021).
  41. Chodick, G., *et al.* The Effectiveness of the Two-Dose BNT162b2 Vaccine: Analysis of Real-World Data. *Clin Infect Dis* **74**, 472-478 (2022).
  42. Bruxvoort, K.J., *et al.* Real-world effectiveness of the mRNA-1273 vaccine against COVID-19: Interim results from a prospective observational cohort study. *Lancet Reg Health Am* **6**, 100134 (2022).
  43. Chung, H., *et al.* Effectiveness of BNT162b2 and mRNA-1273 covid-19 vaccines against symptomatic SARS-CoV-2 infection and severe covid-19 outcomes in Ontario, Canada: test negative design study. *Bmj* **374**, n1943 (2021).
  44. Charmet, T., *et al.* Impact of original, B.1.1.7, and B.1.351/P.1 SARS-CoV-2 lineages on vaccine effectiveness of two doses of COVID-19 mRNA vaccines: Results from a nationwide case-control study in France. *Lancet Reg Health Eur* **8**, 100171 (2021).
  45. Pilishvili, T., *et al.* Interim Estimates of Vaccine Effectiveness of Pfizer-BioNTech and Moderna COVID-19 Vaccines Among Health Care Personnel - 33 U.S. Sites, January-March 2021. *MMWR Morb Mortal Wkly Rep* **70**, 753-758 (2021).
  46. Kim, S.S., *et al.* mRNA Vaccine Effectiveness against COVID-19 among Symptomatic Outpatients Aged  $\geq 16$  Years in the United States, February - May 2021. *J Infect Dis* (2021).
  47. Ranzani, O.T., *et al.* Vaccine effectiveness of Ad26. COV2. S against symptomatic COVID-19 and clinical outcomes in Brazil: a test-negative study design. *medRxiv* (2021).
  48. Thiruvengadam, R., *et al.* Effectiveness of ChAdOx1 nCoV-19 vaccine against SARS-CoV-2 infection during the delta (B.1.617.2) variant surge in India: a test-negative, case-control study and a mechanistic study of post-vaccination immune responses. *Lancet Infect Dis* (2021).
  49. Pramod, S., Govindan, D., Ramasubramani, P., Kar, S.S. & Aggarwal, R. Effectiveness of Covishield vaccine in preventing Covid-19 - A test-negative case-control study. *Vaccine* (2022).
  50. Tseng, H.F., *et al.* Effectiveness of mRNA-1273 against SARS-CoV-2 Omicron and Delta variants. *Nat Med* (2022).
  51. Pettersen, E.F., *et al.* UCSF Chimera--a visualization system for exploratory research and analysis. *J Comput Chem* **25**, 1605-12 (2004).
  52. Ke, Z., *et al.* Structures and distributions of SARS-CoV-2 spike proteins on intact virions. *Nature* **588**, 498-502 (2020).
  53. Yan, R., *et al.* Structural basis for the different states of the spike protein of SARS-CoV-2 in complex with ACE2. *Cell Res* **31**, 717-719 (2021).
